# Supplementary material for: Tick-borne encephalitis virus inhibits rRNA synthesis and host protein production in human cells of neural origin
Source: PubMed Central journal article supplement (PMC6785130; doi:10.1371/journal.pntd.0007745), 2019-09-27
Supplement: pntd.0007745.s007.pdf [file pntd.0007745.s007.pdf]

**S1 Table: List of used primers.**

| <b>Primer</b>                         | <b>Source</b>                                                                                                    | <b>Identifier</b> |
|---------------------------------------|------------------------------------------------------------------------------------------------------------------|-------------------|
| RSAD2-F<br>CAAGACCGGGGAGAATACCTG      | Primer bank<br>( <a href="https://pga.mgh.harvard.edu/primerbank/">https://pga.mgh.harvard.edu/primerbank/</a> ) | 19923667a3        |
| RSAD2-R<br>GCGAGAATGTCCAAATACTCACC    | Primer bank<br>( <a href="https://pga.mgh.harvard.edu/primerbank/">https://pga.mgh.harvard.edu/primerbank/</a> ) | 19923667a3        |
| mGFP-F<br>CCCCTGCCCTTCGCTTATGA        | this paper                                                                                                       | N/A               |
| mGFP-R<br>TGCTTCGCTCCCACGAGTAG        | this paper                                                                                                       | N/A               |
| 5S rRNA-F<br>GTCTACGGCCATACCACCC      | this paper                                                                                                       | N/A               |
| 5S rRNA-R<br>AAAGCCTACAGCACCCGG       | this paper                                                                                                       | N/A               |
| HPRT-F<br>TGACTGGCAAACAATGCA          | Vandesompele et al., 2002                                                                                        | N/A               |
| HPRT-R<br>GGTCCTTTTCACCAGCAAGCT       | Vandesompele et al., 2002                                                                                        | N/A               |
| GAPDH-F<br>CCACATCGCTCAGACACCAT       | Teng et al., 2012                                                                                                | N/A               |
| GAPDH-R<br>GGCAACAATATCCACTTTACCAGAGT | Teng et al., 2012                                                                                                | N/A               |
| POLR1A-F<br>GCGATCCGTTGTCCGAAAG       | this paper                                                                                                       | N/A               |
| POLR1A-R<br>GGTGGGTGTTAAGTATCCTCGTT   | this paper                                                                                                       | N/A               |
| TBEV E01-F<br>GCAGCCAGATGCCCAACAATGG  | this paper                                                                                                       | N/A               |
| TBEV E01-R<br>TCTTTTTTGCTCACAAGCCGCCT | this paper                                                                                                       | N/A               |

**Supplementary references**

Teng TS, Foo SS, Simamarta D, Lum FM, Teo TH, Lulla A, et al. Viperin restricts chikungunya virus replication and pathology. *The Journal of clinical investigation*. 2012;122(12):4447-60.

Vandesompele J, De Preter K, Pattyn F, Poppe B, Van Roy N, De Paepe A, et al. Accurate normalization of real-time quantitative RT-PCR data by geometric averaging of multiple internal control genes. *Genome biology*. 2002;3(7):Research0034.
